# Supplementary material for: Targeted delivery and release of doxorubicin using a pH-responsive and self-assembling copolymer
Source: Royal Society of Chemistry journal article supplement (doi:10.1039/c7tb00190h), 2017-01-01
Supplement: c7tb00190h1.pdf [file c7tb00190h1.pdf]

## Supporting Information

### Targeted delivery and release of Doxorubicin using pH-responsive and self-assembling copolymer

Kaizong Huang<sup>a</sup>, Lingli Zhu<sup>a</sup>, Yunke Wang<sup>a</sup>, Ran Mo<sup>b</sup>, Zichun Hua<sup>a,b\*</sup>

<sup>a</sup> The State Key Laboratory of Pharmaceutical Biotechnology, School of Life

Sciences, Nanjing University, Nanjing, 210046, P.R. China. E-mail:

[zchua@nju.edu.cn](mailto:zchua@nju.edu.cn).

<sup>b</sup> State Key Laboratory of Natural Medicines, China Pharmaceutical University, 24

Tongjia Xiang, Nanjing 210009, P. R. China.

#### Supplementary figures

- 1. Figure S1.** MALDI-TOF analyzed molecular weight of ELP[V<sub>5</sub>-70](a), PEG-ELP[V<sub>5</sub>-70] (b), ELP[VH<sub>4</sub>-70](c) and PEG-ELP[VH<sub>4</sub>-70] (d)
- 2. Figure S2.** ANS analyzed hydrophobicity of PEG, ELP and PEG-ELP.
- 3. Supplemental Figure 2.** Material properties of histidine-rich ELPs and PEG-ELP. turbidimetry (A350) was measured over a range of pH.
- 4. Figure S4.** Hydraulic radius was measured with different pH, presenting 50μM ZnCl<sub>2</sub> (37 °C).
- 5. Figure S5.** Intracellular release of DOX on CT-26 cells at different time (1, 4 h) observed by fluorescence microscopy.
- 6. Figure S6.** Cellular uptake of PEG-ELP/DOX on CT-26 cells.
- 7. Figure S7.** Effects of PEG-ELP/DOX and free DOX viability of CT-26.
- 8. Figure S8.** Effects of PEG-ELP viability of CT-26. Cells were incubated with increasing concentrations of PEG-ELP in culture medium for 24 h. The proliferative response was then assessed by MTT.
- 9. Figure S9.** Plasma concentration-time profiles of DOX following i.v administration of Free DOX, PEG-ELP[V<sub>5</sub>-70]/DOX and PEG-ELP[VH<sub>4</sub>-70]/DOX (5mg/kg).
- 10. Figure S10.** *Ex vivo* fluorescence imaging of the tumor and normal tissues harvested from the euthanized tumor-bearing BALB/c mice injection with different 797 fluorescent agent formulations.

- 11. Figure S11.** Quantification of fluorescent signal intensities of excised organs from mice at 24 h post injection. The data was recorded as total photons per centimeter squared per steradian ( $\text{p/s/cm}^2/\text{sr}$ ).
- 12. Figure S12.** Animals were sacrificed 14 days after withdrawing administration and tumors were harvested and imaged.
- 13. Figure S13.** Tumor sections were immunostained with TUNEL staining for tumor cell apoptosis after treatment with different formulations.
- 14. Figure S14.** Hematoxylin-eosin (H&E) staining examination of tumor from the treated mice.
- 15. Figure S15.** Hematoxylin-eosin (H&E) staining examination of liver from the treated mice.
- 16. Figure S16.** Body weight of each mouse in five groups was measured every three day. Results are expressed as mean  $\pm$  S.D.
- 17. Figure S17.** *In vitro* average diameter distribution of PEG-ELP[VH<sub>4</sub>-70]/DOX over time.

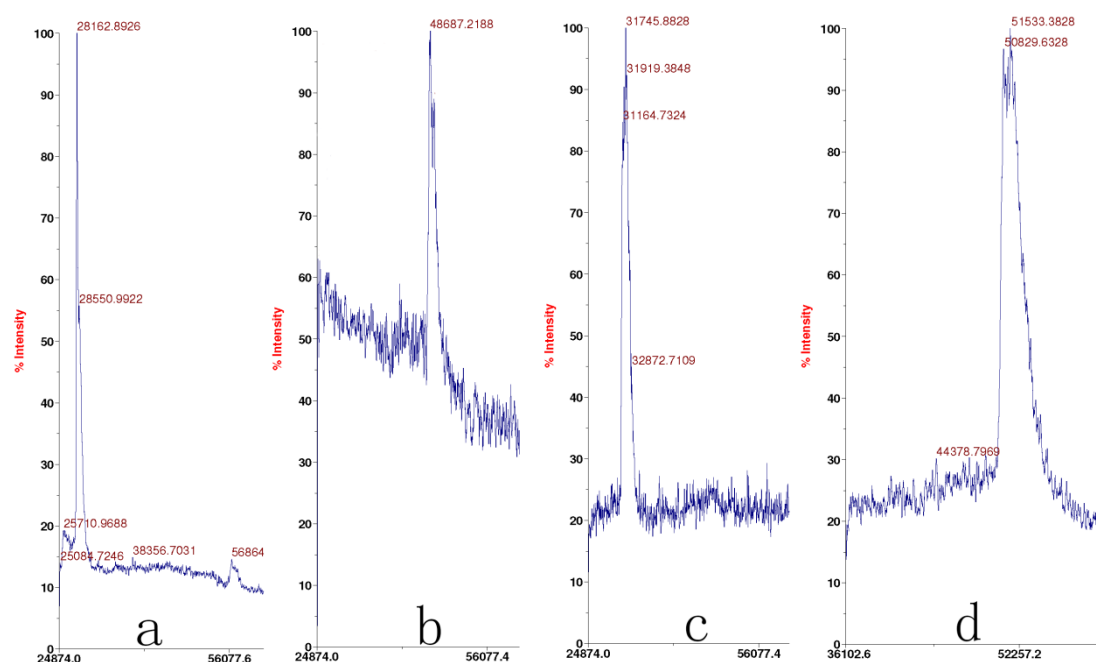

**Figure S1.** MALDI-TOF analyzed molecular weight of ELP[V<sub>5</sub>-70](a), PEG-ELP[V<sub>5</sub>-70] (b), ELP[VH<sub>4</sub>-70](c) and PEG-ELP[VH<sub>4</sub>-70] (d).

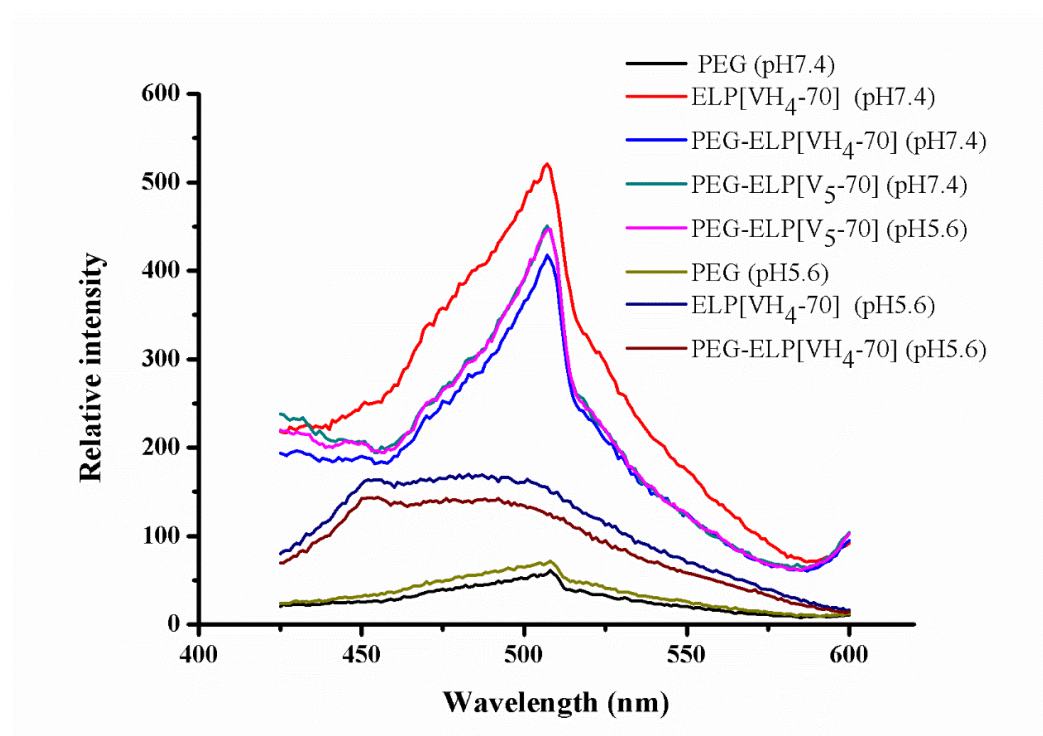

**Figure S2.** ANS analyzed hydrophobicity of PEG, ELP and PEG-ELP.

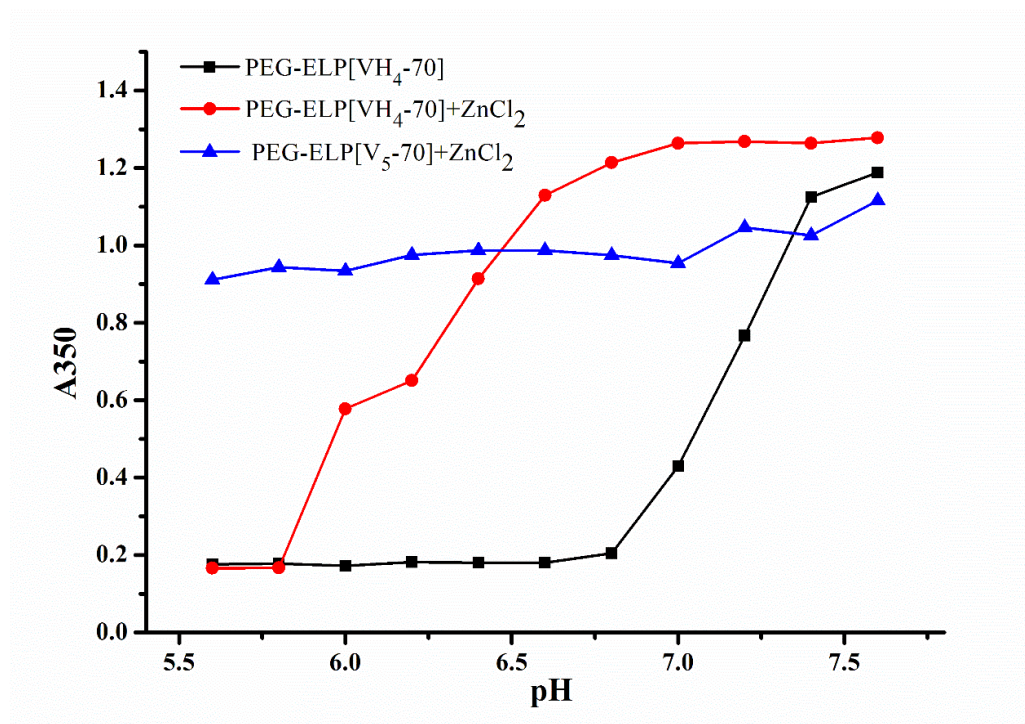

**Figure S3.** Material properties of histidine-rich ELPs and PEG-ELP. Turbidimetry (A350) was measured over a range of pH.

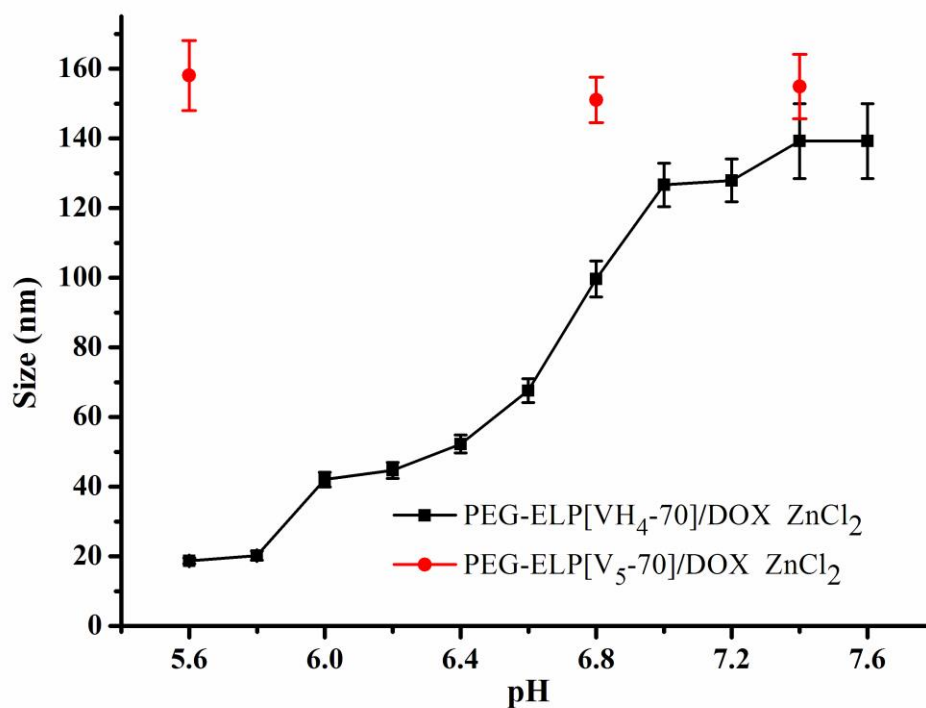

**Figure S4.** Hydraulic radius was measured with different pH, presenting 50 $\mu$ M ZnCl<sub>2</sub> (37 °C).

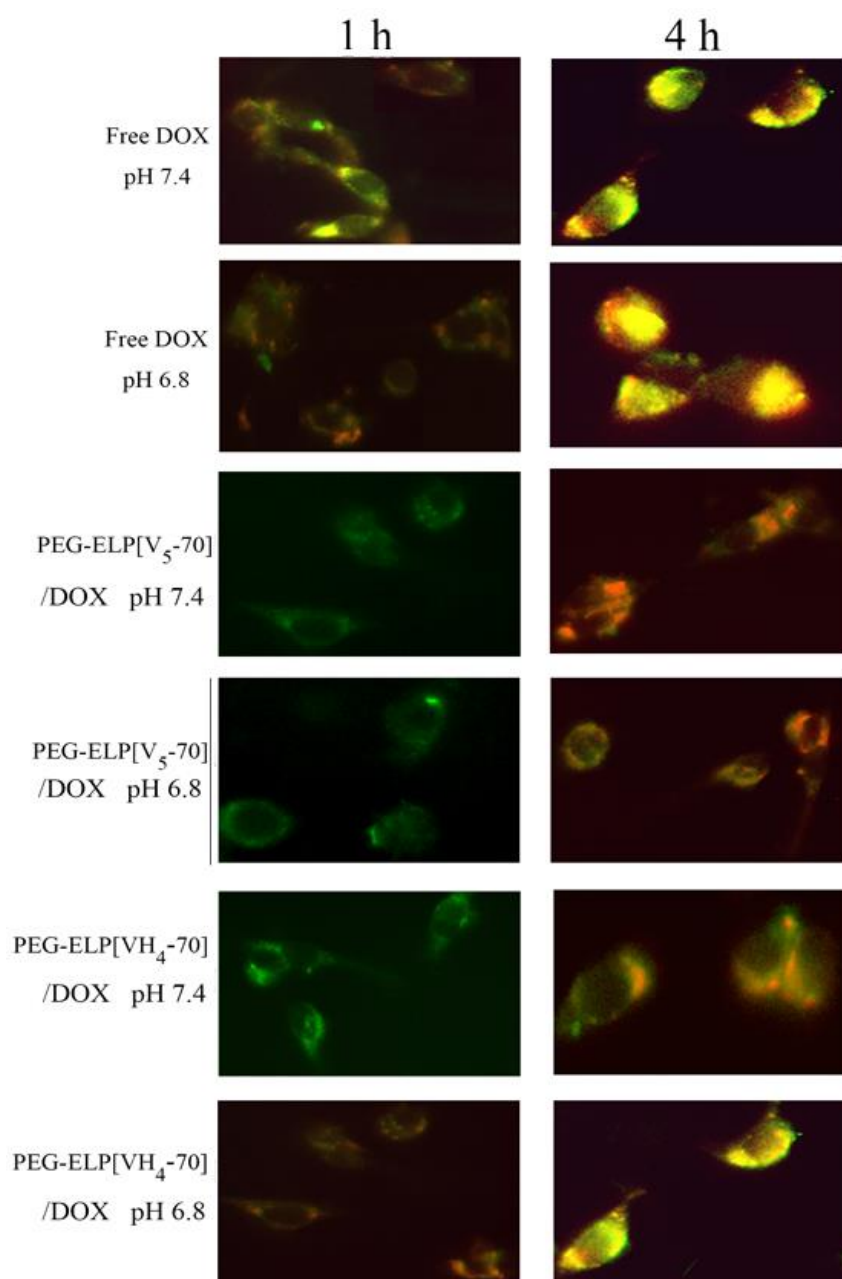

**Figure S5.** Intracellular release of DOX on CT-26 cells at different time (1, 4 h) observed by fluorescence microscopy. The lysosomes were stained by LysoTracker Green.

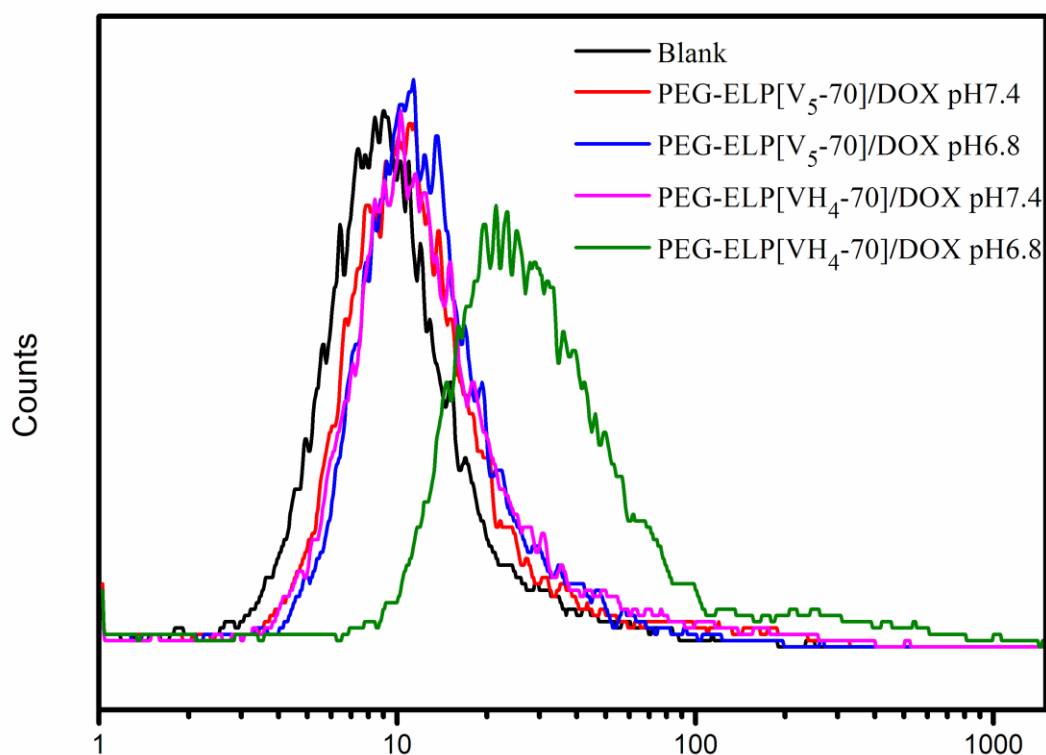

**Figure S6.** Cellular uptake of PEG-ELP/DOX on CT-26 cells.

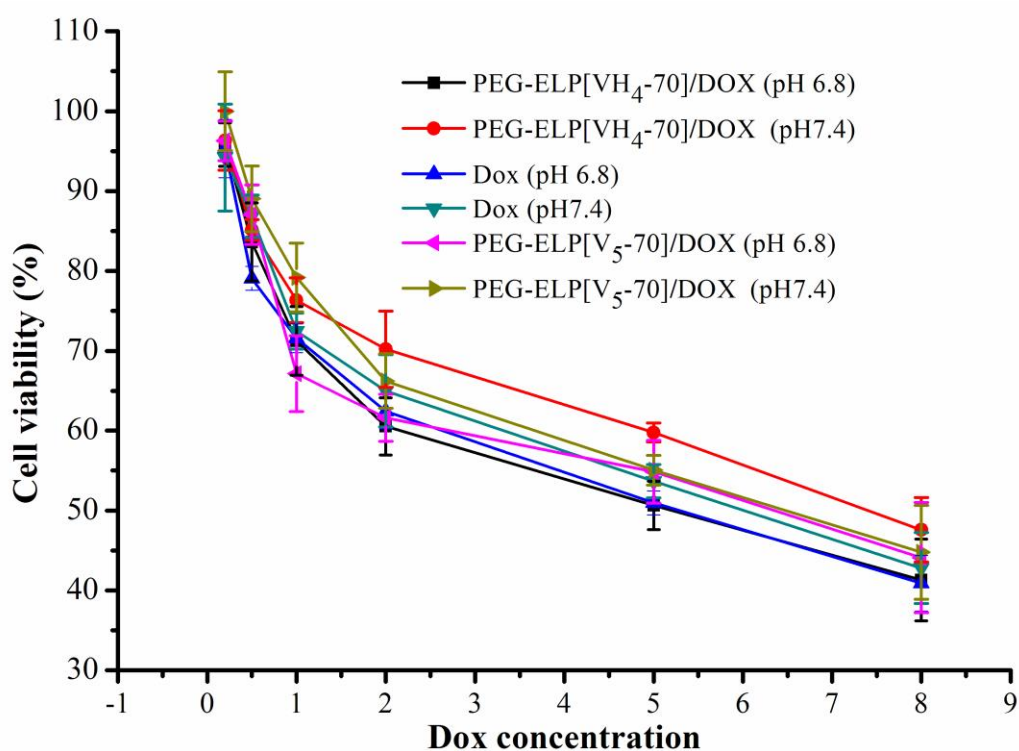

**Figure S7.** Effects of PEG-ELP/DOX and free DOX viability of CT-26. Cells were incubated with increasing concentrations of DOX in culture medium for 24 h. The proliferative response was then assessed by MTT.

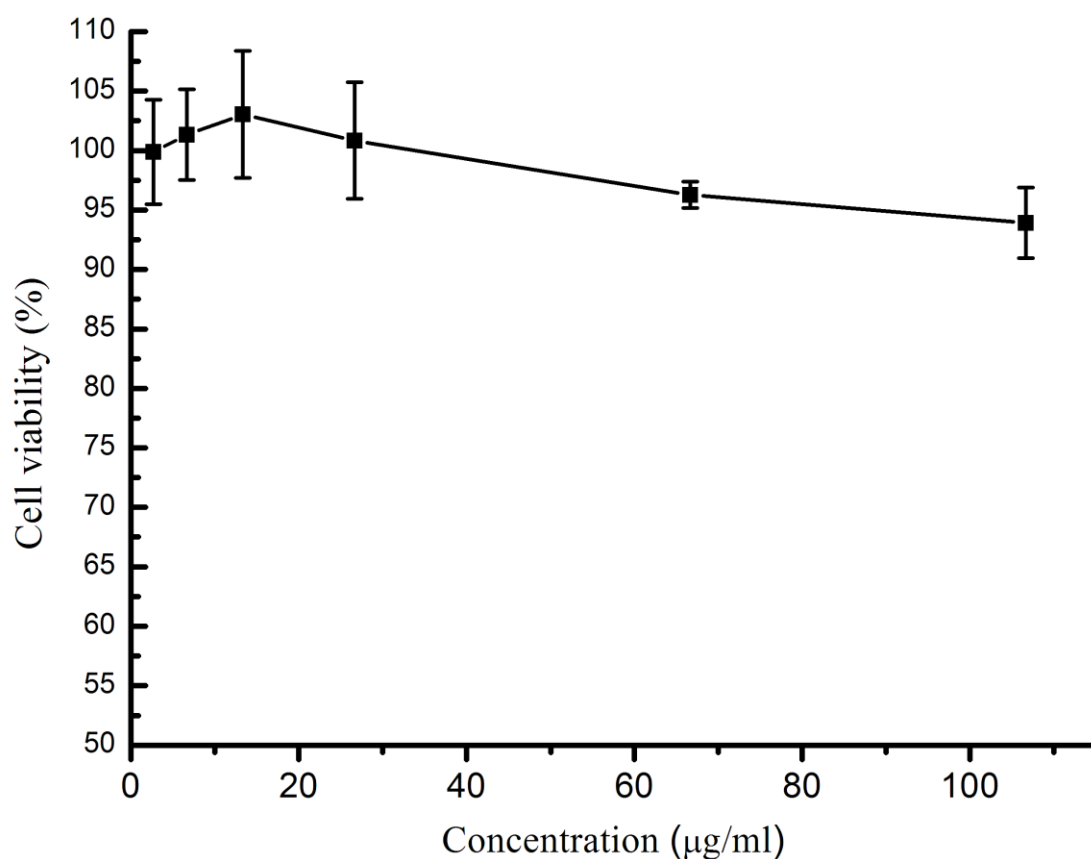

**Figure S8.** Effects of PEG-ELP viability of CT-26. Cells were incubated with increasing concentrations of PEG-ELP in culture medium for 24 h. The proliferative response was then assessed by MTT.

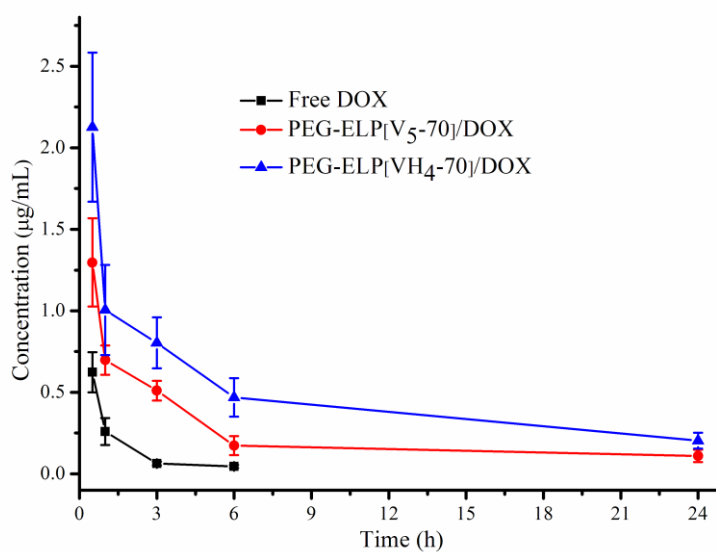

**Figure S9.** Plasma concentration-time profiles of DOX following i.v administration of Free DOX, PEG-ELP[V5-70]/DOX and PEG-ELP[VH4-70]/DOX (5mg/kg).

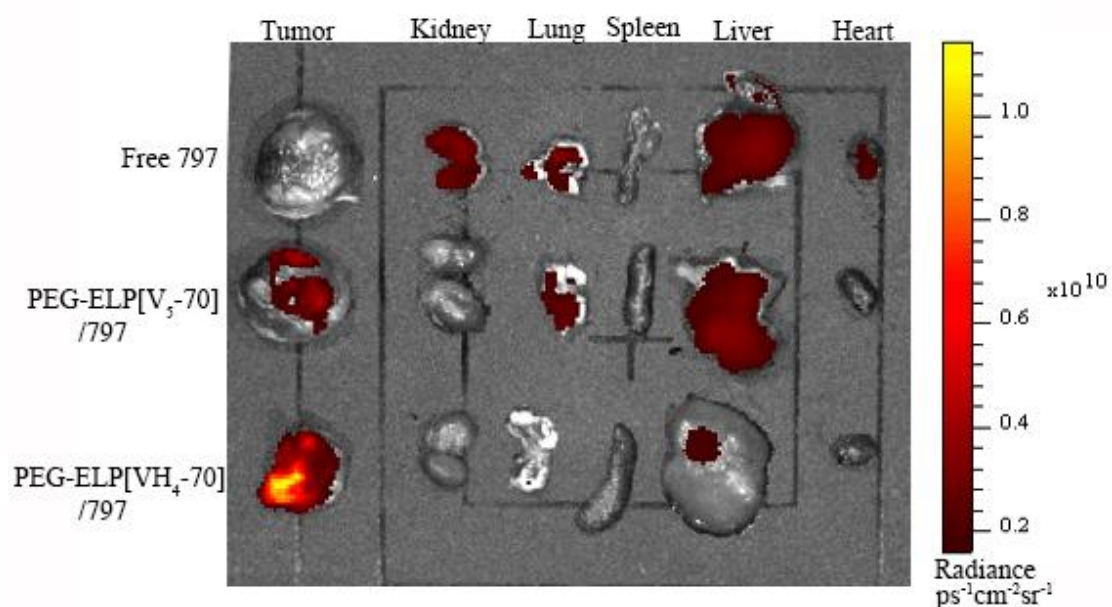

**Figure S10.** *Ex vivo* fluorescence imaging of the tumor and normal tissues harvested from the euthanized tumor-bearing BALB/c mice injection with different 797 fluorescent agent formulations.

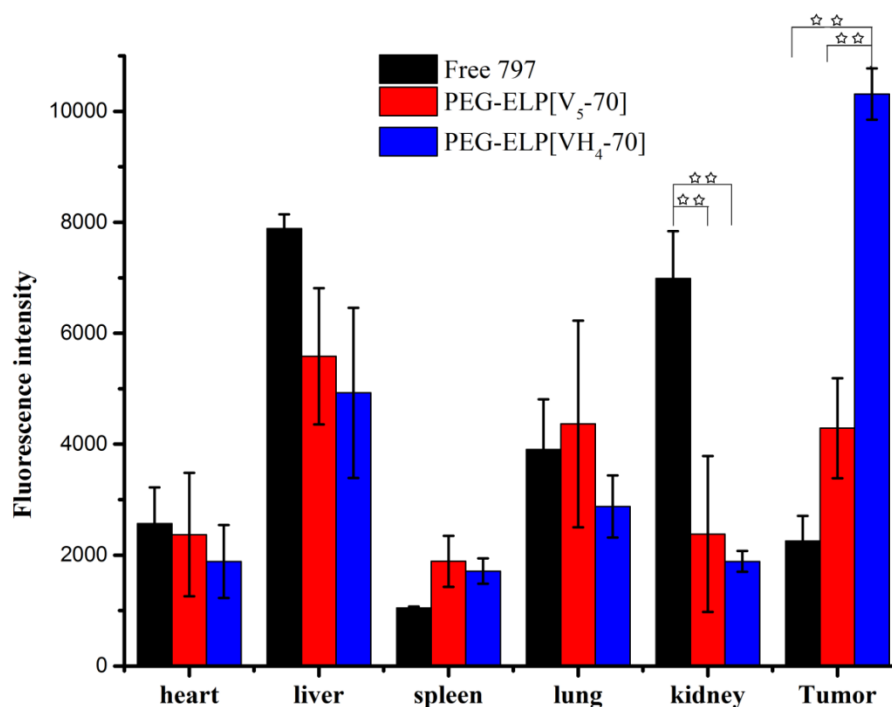

**Figure S11.** Quantification of fluorescent signal intensities of excised organs from mice at 24 h post injection. The data was recorded as total photons per centimeter squared per steradian ( $\text{p/s/cm}^2/\text{sr}$ ).



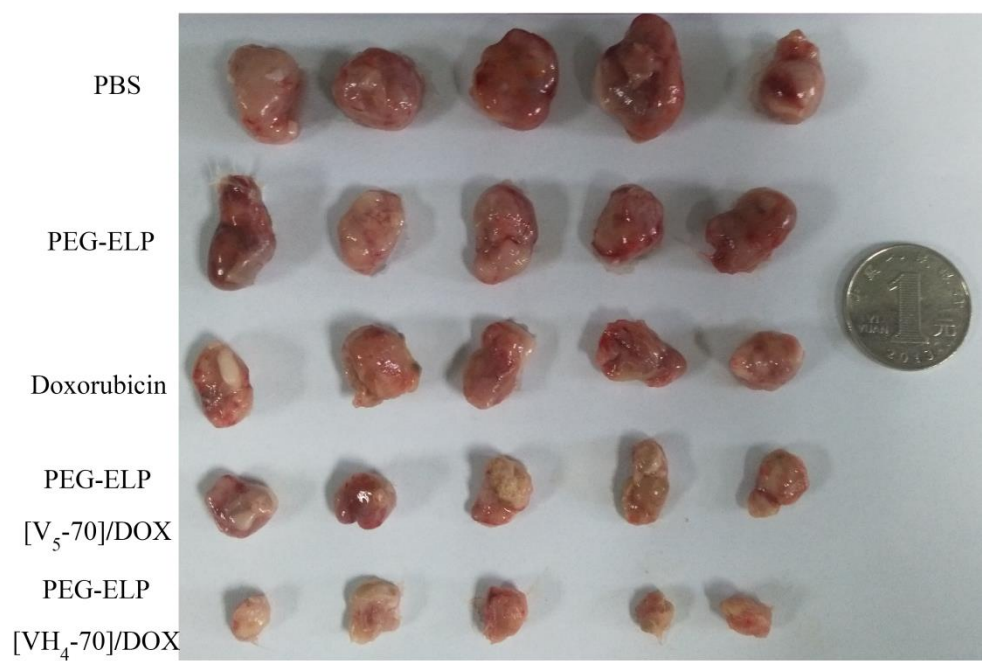

**Figure S12.** Animals were sacrificed 14 days after withdrawing administration and tumors were harvested and imaged.

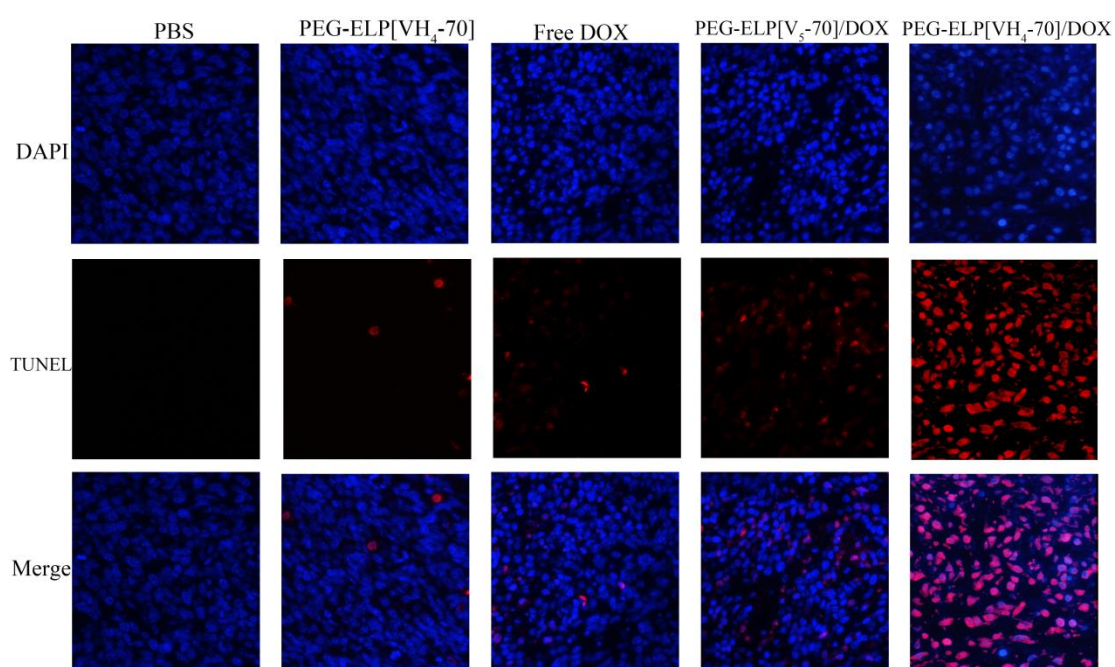

**Figure S13.** Tumor sections were immunostained with TUNEL staining for tumor cell apoptosis after treatment with different formulations.

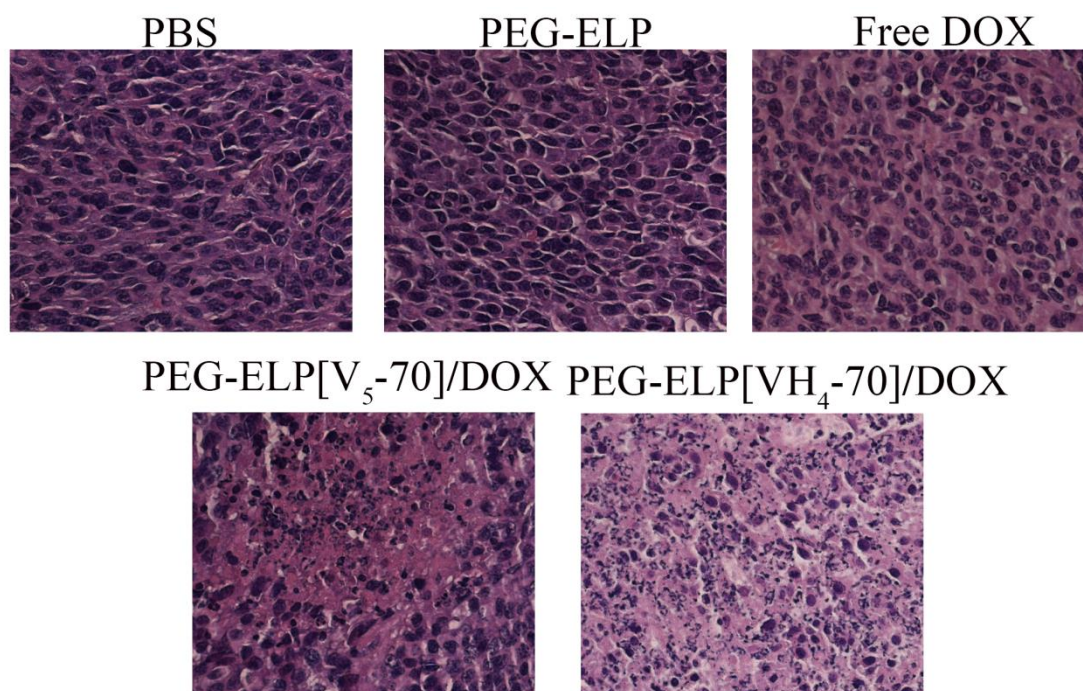

**Figure S14.** Hematoxylin-eosin (H&E) staining examination of tumor from the treated mice.

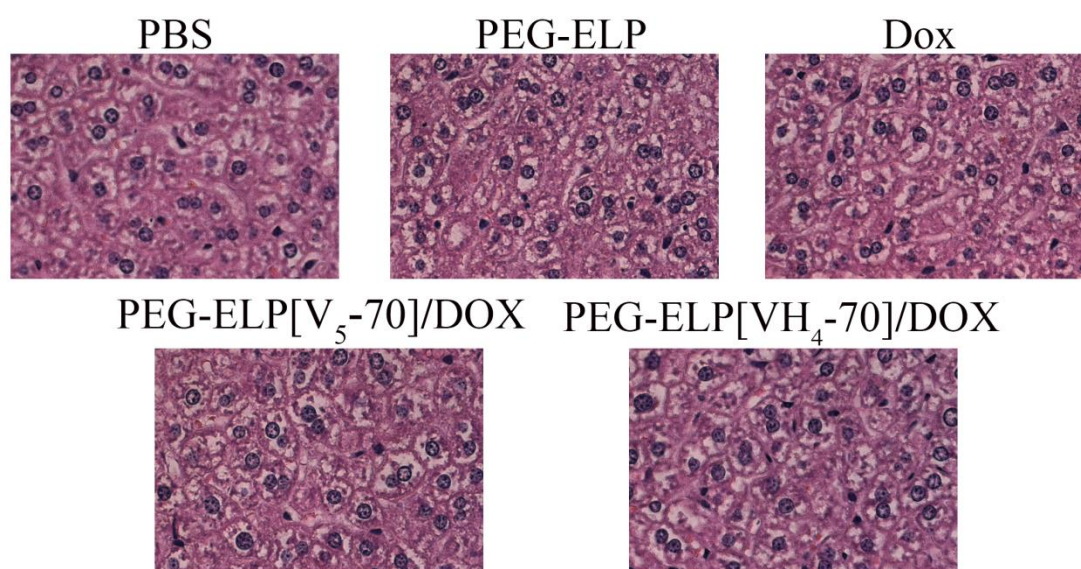

**Figure S15.** Hematoxylin-eosin (H&E) staining examination of liver from the treated mice.

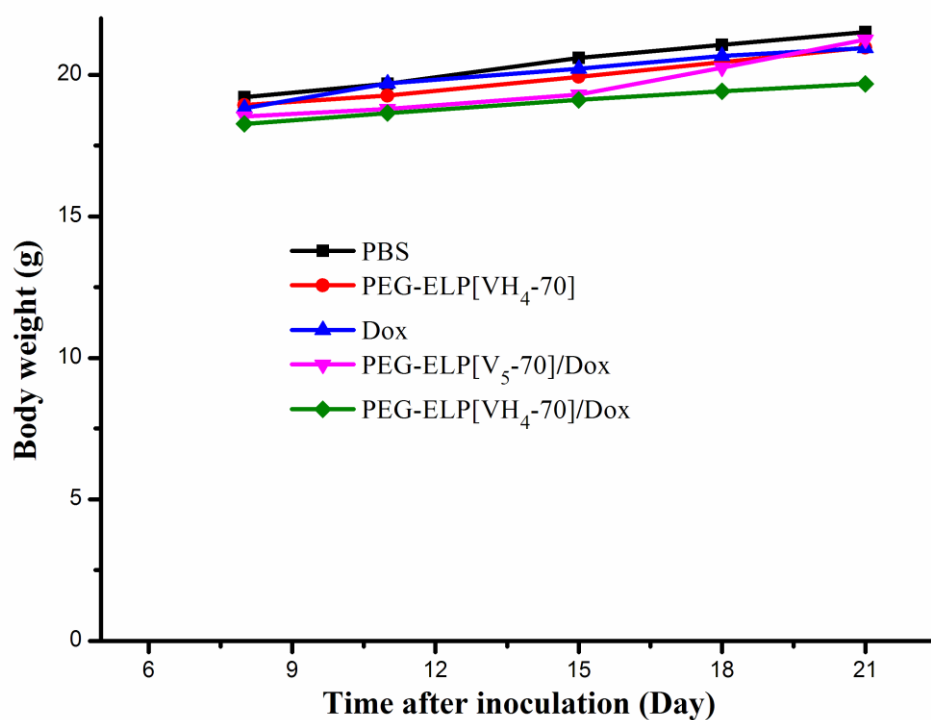

**Figure S16.** Body weight of each mouse in five groups was measured every three day. Results are expressed as mean  $\pm$  S.D.

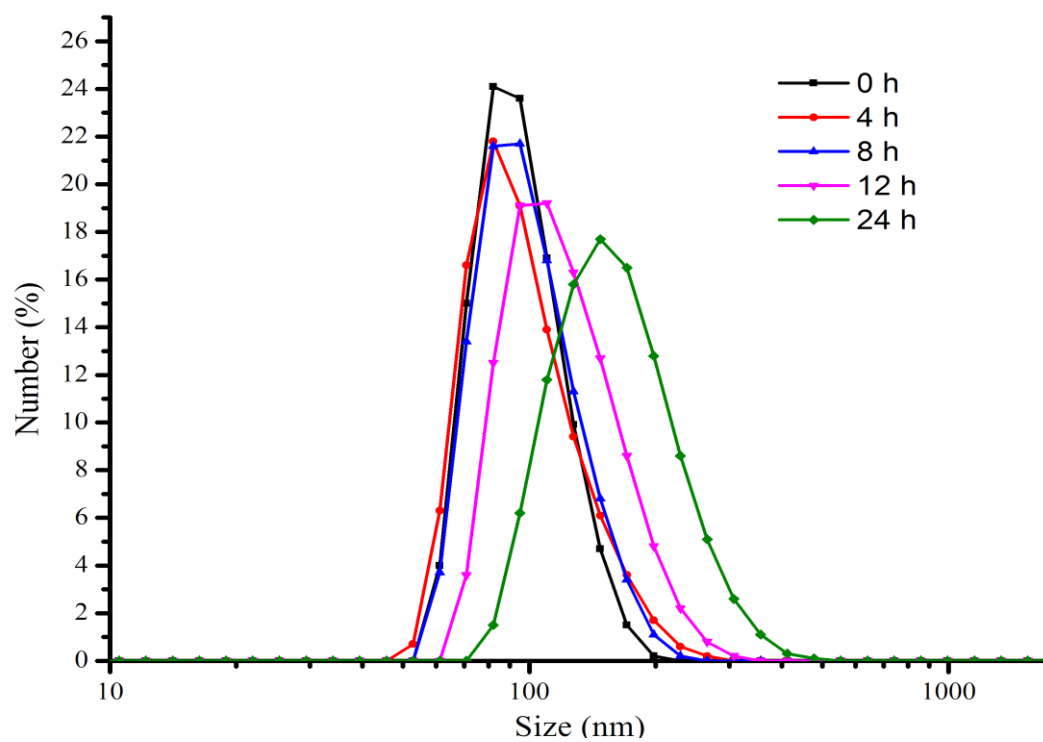

**Figure S17.** *In vitro* average diameter distribution of PEG-ELP[VH<sub>4</sub>-70]/DOX over time.

Table S1: The pharmacokinetic analysis for PEG-ELP/DOX.

| Pharmacokinetic<br>parameter             | Free DOX    | PEG-ELP[V <sub>5</sub> -<br>70]/DOX | PEG-ELP[VH <sub>4</sub><br>-70]/DOX |
|------------------------------------------|-------------|-------------------------------------|-------------------------------------|
| ACU <sub>inf</sub> <sup>a</sup> (mg/L*h) | 0.87 ±0.19  | 6.47 ±0.3*                          | 13.64 ±2.58**                       |
| T <sub>1/2</sub> <sup>b</sup> (h)        | 1.56 ±0.14  | 7.03 ±0.93*                         | 10.65 ±3.42*                        |
| CL <sup>c</sup> (mL/h)                   | 114.37 ±25. | 15.46 ±3.42*                        | 7.32 ±0.76*                         |
| 01                                       |             |                                     |                                     |

Values are means ±s.d. <sup>a</sup>ACU<sub>inf</sub>: (Area under the curve from zero to infinity) ; <sup>b</sup> T<sub>1/2</sub>: Half-life; <sup>c</sup>CL: Clearance. \**P*<0.05, \*\**P*<0.01 vs Free DOX
